# Supplementary material for: Aromatic Characterization of Mangoes (Mangifera indica L.) Using Solid Phase Extraction Coupled with Gas Chromatography–Mass Spectrometry and Olfactometry and Sensory Analyses
Source: PubMed Central journal article supplement (PMC7023010; doi:10.3390/foods9010075), 2020-01-09
Supplement: foods-09-00075-s001.pdf [file foods-09-00075-s001.pdf]

Table S1. Physicochemical characterization of five different cultivars of mango samples

| Cultivars                             | JM                      | QM                      | GF                      | HY                      | TN                       |
|---------------------------------------|-------------------------|-------------------------|-------------------------|-------------------------|--------------------------|
| TA(g/100g)                            | 4.96±0.02 <sup>e</sup>  | 8.20±0.01 <sup>b</sup>  | 6.93±0.02 <sup>d</sup>  | 9.01±0.01 <sup>a</sup>  | 7.30±0.01 <sup>c</sup>   |
| TSS ( <sup>o</sup> Brix)              | 12.38±0.12 <sup>e</sup> | 14.81±0.01 <sup>d</sup> | 16.02±0.20 <sup>c</sup> | 17.91±0.03 <sup>a</sup> | 16.54±0.12 <sup>b</sup>  |
| pH                                    | 4.99±0.02 <sup>a</sup>  | 4.66±0.01 <sup>c</sup>  | 4.86±0.02 <sup>b</sup>  | 4.50±0.01 <sup>d</sup>  | 4.82±0.02 <sup>b</sup>   |
| L                                     | 50.38±0.13 <sup>c</sup> | 49.74±0.07 <sup>b</sup> | 51.44±0.05 <sup>a</sup> | 51.70±0.03 <sup>d</sup> | 61.76±0.14 <sup>cd</sup> |
| a                                     | 4.64±0.02 <sup>c</sup>  | -0.67±0.06 <sup>b</sup> | 4.80±0.02 <sup>b</sup>  | 5.10±0.07 <sup>c</sup>  | 6.56±0.11 <sup>a</sup>   |
| b                                     | 38.51±0.04 <sup>a</sup> | 30.64±0.06 <sup>b</sup> | 36.88±0.08 <sup>e</sup> | 40.57±0.04 <sup>c</sup> | 55.61±0.12 <sup>d</sup>  |
| Total Sugar content (g/g d.w.)        | 8.43±0.05 <sup>e</sup>  | 10.18±0.25 <sup>d</sup> | 14.81±0.07 <sup>c</sup> | 17.23±0.22 <sup>a</sup> | 14.97±0.12 <sup>b</sup>  |
| Reducing sugar content (g/g d.w.)     | 5.84±0.26 <sup>c</sup>  | 3.83±0.08 <sup>e</sup>  | 5.09±0.01 <sup>d</sup>  | 6.66±0.03 <sup>b</sup>  | 7.17±0.21 <sup>a</sup>   |
| β-carotene (mg/g d.w.)                | 0.44±0.08 <sup>b</sup>  | 0.28±0.02 <sup>d</sup>  | 0.28±0.04 <sup>e</sup>  | 0.32±0.02 <sup>c</sup>  | 0.81±0.01 <sup>a</sup>   |
| TPC (mg GAE/g d.w.)                   | 18.05±0.05 <sup>a</sup> | 10.84±0.55 <sup>c</sup> | 14.48±0.09 <sup>e</sup> | 10.83±0.05 <sup>b</sup> | 25.43±0.52 <sup>d</sup>  |
| DPPH Scavenging activity (mg Vc/100g) | 1.86±0.12 <sup>e</sup>  | 0.74±0.08 <sup>c</sup>  | 1.65±0.06 <sup>d</sup>  | 1.07±0.04 <sup>b</sup>  | 2.46±0.11 <sup>a</sup>   |

JM: Jinmang cultivar; QM: Qingmang cultivar; GF: Guifei cultivar; HY: Hongyu cultivar; TN: Tainong cultivar. The mean and standard deviation (n=3) were calculated for three replicates. Values in total data with different letters are significantly different (p < 0.05).

Table S2. Statistical analysis for flavor attributes of five varieties mango samples.

| Cultivars      | JM                     | QM                     | GF                     | HY                     | TN                     |
|----------------|------------------------|------------------------|------------------------|------------------------|------------------------|
| overall aroma  | 1.85±0.88 <sup>d</sup> | 1.55±0.44 <sup>e</sup> | 2.00±0.66 <sup>c</sup> | 2.10±0.55 <sup>b</sup> | 2.4±0.39 <sup>a</sup>  |
| tropical fruit | 1.75±0.75 <sup>c</sup> | 1.8±0.67 <sup>b</sup>  | 1.8±0.48 <sup>b</sup>  | 1.85±0.41 <sup>a</sup> | 1.75±0.35 <sup>c</sup> |
| floral         | 1.35±0.82 <sup>d</sup> | 1.40±0.61 <sup>c</sup> | 1.55±0.69 <sup>a</sup> | 1.45±0.64 <sup>b</sup> | 1.2±0.42 <sup>e</sup>  |
| honey/sweet    | 1.7±0.54 <sup>c</sup>  | 1.4±0.7 <sup>d</sup>   | 1.95±0.57 <sup>a</sup> | 1.85±0.67 <sup>b</sup> | 1.65±0.41 <sup>c</sup> |
| green          | 0.65±0.34 <sup>d</sup> | 0.85±0.53 <sup>c</sup> | 0.95±0.55 <sup>b</sup> | 0.65±0.47 <sup>d</sup> | 1.45±0.55 <sup>a</sup> |
| melon          | 0.9±0.52 <sup>d</sup>  | 1.4±0.66 <sup>b</sup>  | 1.55±0.55 <sup>a</sup> | 1.15±0.24 <sup>c</sup> | 1.55±0.6 <sup>a</sup>  |
| wood           | 1.1±0.21 <sup>d</sup>  | 1.1±0.52 <sup>d</sup>  | 1.4±0.52 <sup>b</sup>  | 1.2±0.42 <sup>c</sup>  | 1.6±0.52 <sup>a</sup>  |
| rosin          | 1.5±0.47 <sup>b</sup>  | 1.4±0.7 <sup>c</sup>   | 1.3±0.54 <sup>d</sup>  | 1.1±0.46 <sup>e</sup>  | 1.75±0.35 <sup>a</sup> |

JM: Jinmang cultivar; QM: Qingmang cultivar; GF: Guifei cultivar; HY: Hongyu cultivar; TN: Tainong cultivar. The mean and standard deviation (n=10) were calculated for three replicates. Values in total data with different letters are significantly different (p < 0.05)
